# Supplementary material
Source: MDPI journal article supplement (https://www.mdpi.com/2076-3417/12/5/2414)
Supplement: s1 [file s1]

**Table S1.**

| <b>Variable</b>                       | <b>Variable Name</b> |
|---------------------------------------|----------------------|
| Insomnia status                       | BCINSOMN             |
| Low energy                            | BCENERGY             |
| History of hypertension               | HMHYPERT             |
| Height                                | VSHEIGHT             |
| Height units                          | VSHTUNIT             |
| Weight                                | VSWEIGHT             |
| Weight units                          | VSWTUNIT             |
| Month of birth                        | PTDOBMM              |
| Year of birth                         | PTDOBY               |
| Date of baseline evaluation           | USERDATE             |
| Self-reported sex                     | PTGENDER             |
| Cognitive status (ADNI-1)             | DXCURREN             |
| Cognitive status (ADNI-GO and ADNI-2) | DXCHANGE             |
| APOE4 allele number                   | APOE4                |
| Race                                  | PTRACCAT             |
| Ethnicity                             | PTETCHAT             |
| Marital status                        | PTMARRY              |
| Education in years                    | PTEDUCAT             |
| History of cardiovascular disease     | MH4CARD              |
| History of smoking                    | MH16SMOK             |
| History of alcohol abuse              | MH17MALI             |

The names of ADNI database variable used in this study.
